# Supplementary material for: A uranium–zinc–organic molecular compound containing planar tetranuclear uranyl units
Source: Royal Society of Chemistry journal article supplement (doi:10.1039/b309634c), 2003-01-01
Supplement: b309634c.pdf [file b309634c.pdf]

Supporting information

**A Uranium-Zinc-Organic Molecular Compound Containing Planar  
Tetranuclear Uranyl Units**

Zhen-Tao Yu, Guang-Hua Li, Yu-Sheng Jiang, Jin-Jie Xu and Jie-Sheng  
Chen\*

State Key Laboratory of Inorganic Synthesis and Preparative Chemistry, College of  
Chemistry, Jilin University, Changchun 130023, P. R. China. Fax: (+86) 431 5671974;  
E-mail: chemcj@mail.jlu.edu.cn.

Table S1. Crystal data and structure refinement for  $\text{Zn}_2(\text{phen})_4\text{U}_4\text{O}_{10}(\text{OAc})_2(\text{NA})_2(\text{QA})_2$ .

|                                   |                                                                                                                                    |
|-----------------------------------|------------------------------------------------------------------------------------------------------------------------------------|
| Empirical formula                 | $\text{C}_{39}\text{H}_{26}\text{N}_6\text{O}_{13}\text{U}_2\text{Zn}$                                                             |
| Formula weight                    | 1328.09                                                                                                                            |
| Temperature                       | 293(2) K                                                                                                                           |
| Wavelength                        | 0.71073 Å                                                                                                                          |
| Crystal system                    | Monoclinic                                                                                                                         |
| Space group                       | $P2_1/c$                                                                                                                           |
| Unit cell dimensions              | $a = 12.9751(6)$ Å $\alpha = 90^\circ$<br>$b = 20.3412(8)$ Å $\beta = 92.2870(10)^\circ$<br>$c = 14.6543(6)$ Å $\gamma = 90^\circ$ |
| Volume                            | 3864.6(3) Å <sup>3</sup>                                                                                                           |
| Z                                 | 4                                                                                                                                  |
| Calculated density                | 2.283 Mg/m <sup>3</sup>                                                                                                            |
| Absorption coefficient            | 9.053 mm <sup>-1</sup>                                                                                                             |
| F(000)                            | 2480                                                                                                                               |
| Crystal size                      | 0.45 × 0.45 × 0.20 mm                                                                                                              |
| Theta range for data collection   | 1.71 to 23.29°                                                                                                                     |
| Limiting indices                  | $-11 \leq h \leq 14$ , $-22 \leq k \leq 22$ , $-16 \leq l \leq 16$                                                                 |
| Reflections collected / unique    | 18371 / 5563 [R(int) = 0.0444]                                                                                                     |
| Completeness to theta = 23.29     | 99.7 %                                                                                                                             |
| Max. and min. transmission        | 0.4062 and 0.1819                                                                                                                  |
| Refinement method                 | Full-matrix least-squares on F <sup>2</sup>                                                                                        |
| Data / parameters                 | 5563 / 550                                                                                                                         |
| Goodness-of-fit on F <sup>2</sup> | 1.002                                                                                                                              |
| Final R indices [I > 2σ(I)]       | R1 = 0.0247, wR2 = 0.0577                                                                                                          |
| Largest diff. peak and hole       | 1.104 and -0.883 e. Å <sup>-3</sup>                                                                                                |

Table S2. Atomic coordinates ( $\times 10^4$ ) and equivalent isotropic displacement parameters ( $\text{\AA}^2 \times 10^3$ ) for  $\text{Zn}_2(\text{phen})_4\text{U}_4\text{O}_{10}(\text{OAc})_2(\text{NA})_2(\text{QA})_2$ .  $U(\text{eq})$  is defined as one third of the trace of the orthogonalized  $U_{ij}$  tensor.

| Atom  | x        | y       | z        | $U(\text{eq})^a$ |
|-------|----------|---------|----------|------------------|
| U(1)  | 4224(1)  | 4378(1) | -4439(1) | 25(1)            |
| U(2)  | 7202(1)  | 4103(1) | -4296(1) | 32(1)            |
| Zn(1) | 2506(1)  | 3622(1) | -985(1)  | 31(1)            |
| O(1)  | 3386(3)  | 3486(2) | -3660(2) | 32(1)            |
| O(2)  | 2446(3)  | 3614(2) | -2438(3) | 34(1)            |
| O(3)  | 5557(3)  | 3606(2) | -3768(3) | 38(1)            |
| O(4)  | 5489(4)  | 2514(2) | -3965(3) | 44(1)            |
| O(5)  | 7553(4)  | 3086(2) | -3367(3) | 58(1)            |
| O(6)  | 8897(3)  | 3595(2) | -3855(3) | 54(1)            |
| O(7)  | 2463(4)  | 4733(3) | -4536(4) | 79(2)            |
| O(8)  | 1316(4)  | 5436(3) | -4922(4) | 70(2)            |
| O(9)  | 5843(3)  | 4669(2) | -4767(3) | 32(1)            |
| O(10) | 4345(3)  | 4806(2) | -3380(2) | 40(1)            |
| O(11) | 4027(3)  | 3896(2) | -5440(3) | 36(1)            |
| O(12) | 7369(4)  | 4600(2) | -3314(3) | 56(1)            |
| O(13) | 7108(3)  | 3601(2) | -5274(3) | 46(1)            |
| N(1)  | 3867(4)  | 3079(2) | -1340(3) | 30(1)            |
| N(2)  | 10870(6) | 2106(4) | -2925(5) | 81(2)            |
| N(3)  | 928(4)   | 4013(2) | -992(3)  | 39(1)            |
| N(4)  | 1610(4)  | 2770(2) | -730(3)  | 37(1)            |
| N(5)  | 3035(4)  | 3795(2) | 434(3)   | 37(1)            |
| N(6)  | 3093(4)  | 4614(2) | -1013(3) | 31(1)            |
| C(1)  | 4105(4)  | 3153(2) | -2224(3) | 24(1)            |
| C(2)  | 5024(4)  | 2927(2) | -2549(3) | 27(1)            |
| C(3)  | 5688(5)  | 2574(3) | -1956(4) | 35(1)            |
| C(4)  | 5428(5)  | 2479(3) | -1067(4) | 38(2)            |
| C(5)  | 4518(5)  | 2748(3) | -783(4)  | 38(2)            |
| C(6)  | 3250(4)  | 3448(2) | -2815(4) | 27(1)            |
| C(7)  | 5360(4)  | 3002(3) | -3520(4) | 30(1)            |
| C(8)  | 10233(6) | 2616(3) | -3142(5) | 52(2)            |
| C(9)  | 9175(5)  | 2539(3) | -3235(4) | 44(2)            |
| C(10) | 8782(7)  | 1927(4) | -3100(6) | 71(2)            |
| C(11) | 9400(9)  | 1399(4) | -2901(7) | 88(3)            |
| C(12) | 10418(9) | 1515(5) | -2813(7) | 90(3)            |
| C(13) | 8500(5)  | 3102(3) | -3490(4) | 42(2)            |
| C(14) | 916(6)   | 4696(4) | -3755(5) | 59(2)            |
| C(15) | 1608(5)  | 4968(3) | -4432(4) | 35(1)            |

|       |          |         |          |       |
|-------|----------|---------|----------|-------|
| C(16) | 598(6)   | 4618(3) | -1134(5) | 57(2) |
| C(17) | -453(7)  | 4781(4) | -1238(7) | 79(3) |
| C(18) | -1150(6) | 4305(4) | -1186(6) | 69(2) |
| C(19) | -857(5)  | 3655(3) | -1023(5) | 50(2) |
| C(20) | 202(5)   | 3532(3) | -930(4)  | 36(1) |
| C(21) | 576(5)   | 2868(3) | -776(4)  | 37(1) |
| C(22) | -139(5)  | 2358(3) | -699(4)  | 47(2) |
| C(23) | 260(7)   | 1728(4) | -551(5)  | 62(2) |
| C(24) | 1300(7)  | 1630(3) | -491(5)  | 64(2) |
| C(25) | 1952(5)  | 2167(3) | -598(4)  | 48(2) |
| C(26) | -1556(5) | 3118(4) | -940(5)  | 64(2) |
| C(27) | -1214(6) | 2507(4) | -780(5)  | 63(2) |
| C(28) | 3029(6)  | 3391(3) | 1131(4)  | 52(2) |
| C(29) | 3373(6)  | 3574(4) | 2019(4)  | 57(2) |
| C(30) | 3722(6)  | 4200(4) | 2183(4)  | 53(2) |
| C(31) | 3743(5)  | 4640(3) | 1453(4)  | 39(2) |
| C(32) | 3393(4)  | 4416(3) | 584(4)   | 32(1) |
| C(33) | 3422(4)  | 4852(3) | -190(4)  | 32(1) |
| C(34) | 3773(5)  | 5501(3) | -67(5)   | 41(2) |
| C(35) | 3790(6)  | 5910(3) | -852(5)  | 49(2) |
| C(36) | 3472(6)  | 5666(3) | -1667(5) | 48(2) |
| C(37) | 3115(5)  | 5014(3) | -1737(4) | 37(2) |
| C(38) | 4104(5)  | 5302(4) | 1553(5)  | 51(2) |
| C(39) | 4116(5)  | 5715(3) | 828(5)   | 49(2) |

Table S3. Bond lengths [Å] and angles [°] for  $\text{Zn}_2(\text{phen})_4\text{U}_4\text{O}_{10}(\text{OAc})_2(\text{NA})_2(\text{QA})_2^{\text{a}}$ .

|                   |            |                   |           |
|-------------------|------------|-------------------|-----------|
| U(1)-O(11)        | 1.775(4)   | U(2)-O(13)        | 1.760(4)  |
| U(1)-O(10)        | 1.780(4)   | U(2)-O(12)        | 1.765(4)  |
| U(1)-O(9)         | 2.253(4)   | U(2)-O(9)         | 2.193(4)  |
| U(1)-O(9)#1       | 2.262(3)   | U(2)-O(8)#1       | 2.462(5)  |
| U(1)-O(7)         | 2.395(5)   | U(2)-O(6)         | 2.492(4)  |
| U(1)-O(1)         | 2.425(4)   | U(2)-O(5)         | 2.509(4)  |
| U(1)-O(3)         | 2.507(4)   | U(2)-O(3)         | 2.511(4)  |
| Zn(1)-O(2)        | 2.128(4)   | Zn(1)-N(1)        | 2.164(5)  |
| Zn(1)-N(4)        | 2.128(5)   | Zn(1)-N(5)        | 2.192(5)  |
| Zn(1)-N(6)        | 2.158(5)   | Zn(1)-N(3)        | 2.196(5)  |
| O(11)-U(1)-O(10)  | 174.45(18) | O(13)-U(2)-O(12)  | 176.9(2)  |
| O(11)-U(1)-O(9)   | 94.21(16)  | O(13)-U(2)-O(9)   | 91.09(18) |
| O(10)-U(1)-O(9)   | 90.42(17)  | O(12)-U(2)-O(9)   | 91.59(18) |
| O(11)-U(1)-O(9)#1 | 92.65(15)  | O(13)-U(2)-O(8)#1 | 82.7(2)   |
| O(10)-U(1)-O(9)#1 | 91.71(16)  | O(12)-U(2)-O(8)#1 | 95.1(2)   |

|                  |            |                  |            |
|------------------|------------|------------------|------------|
| O(9)-U(1)-O(9)#1 | 71.49(15)  | O(9)-U(2)-O(8)#1 | 106.68(15) |
| O(11)-U(1)-O(7)  | 90.6(2)    | O(13)-U(2)-O(6)  | 90.13(18)  |
| O(10)-U(1)-O(7)  | 87.4(2)    | O(12)-U(2)-O(6)  | 87.00(19)  |
| O(9)-U(1)-O(7)   | 143.50(16) | O(9)-U(2)-O(6)   | 171.58(14) |
| O(9)#1-U(1)-O(7) | 72.17(16)  | O(8)#1-U(2)-O(6) | 65.23(15)  |
| O(11)-U(1)-O(1)  | 85.59(15)  | O(13)-U(2)-O(5)  | 88.18(18)  |
| O(10)-U(1)-O(1)  | 88.93(15)  | O(12)-U(2)-O(5)  | 90.9(2)    |
| O(9)-U(1)-O(1)   | 137.45(13) | O(9)-U(2)-O(5)   | 136.85(14) |
| O(9)#1-U(1)-O(1) | 151.05(13) | O(8)#1-U(2)-O(5) | 115.98(16) |
| O(7)-U(1)-O(1)   | 78.96(17)  | O(6)-U(2)-O(5)   | 51.53(14)  |
| O(11)-U(1)-O(3)  | 93.04(16)  | O(13)-U(2)-O(3)  | 89.13(17)  |
| O(10)-U(1)-O(3)  | 85.94(17)  | O(12)-U(2)-O(3)  | 93.29(19)  |
| O(9)-U(1)-O(3)   | 67.26(12)  | O(9)-U(2)-O(3)   | 68.02(12)  |
| O(9)#1-U(1)-O(3) | 138.65(13) | O(8)#1-U(2)-O(3) | 170.23(16) |
| O(7)-U(1)-O(3)   | 148.60(17) | O(6)-U(2)-O(3)   | 120.33(13) |
| O(1)-U(1)-O(3)   | 70.27(13)  | O(5)-U(2)-O(3)   | 68.82(13)  |
| O(2)-Zn(1)-N(4)  | 99.85(17)  | N(6)-Zn(1)-N(5)  | 76.71(18)  |
| O(2)-Zn(1)-N(6)  | 89.27(16)  | N(1)-Zn(1)-N(5)  | 94.73(18)  |
| N(4)-Zn(1)-N(6)  | 163.88(18) | O(2)-Zn(1)-N(3)  | 90.10(17)  |
| O(2)-Zn(1)-N(1)  | 75.68(15)  | N(4)-Zn(1)-N(3)  | 77.31(19)  |
| N(4)-Zn(1)-N(1)  | 94.77(18)  | N(6)-Zn(1)-N(3)  | 89.50(18)  |
| N(6)-Zn(1)-N(1)  | 100.39(17) | N(1)-Zn(1)-N(3)  | 162.45(18) |
| O(2)-Zn(1)-N(5)  | 161.45(17) | N(5)-Zn(1)-N(3)  | 101.69(19) |
| N(4)-Zn(1)-N(5)  | 96.71(18)  |                  |            |

<sup>a</sup> Symmetry transformations used to generate equivalent atoms:

#1 -x+1, -y+1, -z-1

Table S4. Anisotropic displacement parameters ( $\text{\AA}^2 \times 10^3$ ) for  $\text{Zn}_2(\text{phen})_4\text{U}_4\text{O}_{10}(\text{OAc})_2(\text{NA})_2(\text{QA})_2$ . The anisotropic displacement factor exponent takes the form:  $-2\pi^2[h^2a^2U11+ \dots + 2hkabU12]$ .

|       | U11   | U22   | U33    | U23   | U13   | U12   |
|-------|-------|-------|--------|-------|-------|-------|
| U(1)  | 25(1) | 25(1) | 25(1)  | 3(1)  | 1(1)  | 3(1)  |
| U(2)  | 25(1) | 34(1) | 36(1)  | 1(1)  | -1(1) | 7(1)  |
| Zn(1) | 30(1) | 29(1) | 35(1)  | 0(1)  | 3(1)  | -3(1) |
| O(1)  | 29(2) | 38(2) | 28(2)  | 7(2)  | 0(2)  | 0(2)  |
| O(2)  | 29(2) | 41(2) | 33(2)  | 3(2)  | 2(2)  | 3(2)  |
| O(3)  | 28(2) | 39(2) | 46(2)  | 20(2) | 4(2)  | 6(2)  |
| O(4)  | 61(3) | 42(3) | 31(2)  | -7(2) | 4(2)  | 5(2)  |
| O(5)  | 31(3) | 66(3) | 76(3)  | 30(3) | 3(2)  | 10(2) |
| O(6)  | 31(3) | 53(3) | 77(3)  | 27(3) | 1(2)  | 7(2)  |
| O(7)  | 28(3) | 69(4) | 140(5) | -4(3) | 8(3)  | 11(3) |
| O(8)  | 64(4) | 68(3) | 79(4)  | 40(3) | 0(3)  | -5(3) |
| O(9)  | 25(2) | 30(2) | 42(2)  | 12(2) | 6(2)  | 4(2)  |
| O(10) | 44(3) | 45(2) | 31(2)  | -7(2) | 7(2)  | -1(2) |
| O(11) | 42(3) | 34(2) | 33(2)  | -1(2) | 2(2)  | 0(2)  |

|       |        |       |        |        |        |        |
|-------|--------|-------|--------|--------|--------|--------|
| O(12) | 52(3)  | 62(3) | 52(3)  | -16(2) | -9(2)  | 13(2)  |
| O(13) | 41(3)  | 44(3) | 53(3)  | -8(2)  | 4(2)   | 7(2)   |
| N(1)  | 31(3)  | 31(3) | 27(2)  | 0(2)   | 3(2)   | -4(2)  |
| N(2)  | 66(5)  | 89(6) | 87(5)  | -5(4)  | -9(4)  | 35(4)  |
| N(3)  | 30(3)  | 38(3) | 49(3)  | 3(2)   | 9(2)   | 0(2)   |
| N(4)  | 38(3)  | 34(3) | 40(3)  | 8(2)   | 1(2)   | -6(2)  |
| N(5)  | 42(3)  | 35(3) | 35(3)  | 0(2)   | 5(2)   | -2(2)  |
| N(6)  | 24(3)  | 32(3) | 36(3)  | -1(2)  | 5(2)   | -4(2)  |
| C(1)  | 29(3)  | 19(3) | 25(3)  | 0(2)   | 0(2)   | -2(2)  |
| C(2)  | 34(3)  | 20(3) | 27(3)  | 3(2)   | -5(3)  | -4(2)  |
| C(3)  | 38(4)  | 34(3) | 31(3)  | 4(3)   | -4(3)  | 9(3)   |
| C(4)  | 42(4)  | 42(4) | 32(3)  | 9(3)   | -1(3)  | 5(3)   |
| C(5)  | 41(4)  | 46(4) | 25(3)  | 4(3)   | 0(3)   | -1(3)  |
| C(6)  | 25(3)  | 20(3) | 36(3)  | 4(2)   | -4(3)  | -10(2) |
| C(7)  | 25(3)  | 35(4) | 30(3)  | 7(3)   | -4(2)  | 4(3)   |
| C(8)  | 45(5)  | 60(5) | 49(4)  | 12(3)  | -3(3)  | 20(4)  |
| C(9)  | 48(5)  | 40(4) | 43(4)  | 7(3)   | -2(3)  | 8(3)   |
| C(10) | 64(6)  | 54(5) | 95(6)  | 18(4)  | -22(5) | 1(4)   |
| C(11) | 110(9) | 27(4) | 125(8) | 6(4)   | -31(7) | 3(5)   |
| C(12) | 114(9) | 62(6) | 90(7)  | -10(5) | -25(6) | 48(6)  |
| C(13) | 31(4)  | 46(4) | 50(4)  | 13(3)  | -1(3)  | 7(3)   |
| C(14) | 48(5)  | 72(5) | 56(4)  | 12(4)  | 7(4)   | -14(4) |
| C(15) | 25(4)  | 33(3) | 46(4)  | 3(3)   | 2(3)   | -3(3)  |
| C(16) | 44(5)  | 48(4) | 80(5)  | 11(4)  | 17(4)  | 4(3)   |
| C(17) | 50(6)  | 63(5) | 126(8) | 21(5)  | 14(5)  | 13(4)  |
| C(18) | 40(5)  | 73(6) | 94(6)  | 18(5)  | 9(4)   | 17(4)  |
| C(19) | 31(4)  | 63(5) | 56(4)  | 1(3)   | 6(3)   | 4(3)   |
| C(20) | 31(4)  | 44(4) | 33(3)  | 2(3)   | 6(3)   | -2(3)  |
| C(21) | 34(4)  | 48(4) | 28(3)  | 6(3)   | 0(3)   | -11(3) |
| C(22) | 44(4)  | 46(4) | 49(4)  | 9(3)   | -2(3)  | -17(3) |
| C(23) | 72(6)  | 49(5) | 67(5)  | 9(4)   | 8(4)   | -32(4) |
| C(24) | 75(6)  | 36(4) | 81(6)  | 20(4)  | -2(5)  | -7(4)  |
| C(25) | 43(4)  | 46(4) | 53(4)  | 10(3)  | -8(3)  | -3(3)  |
| C(26) | 27(4)  | 91(6) | 76(5)  | 6(5)   | 5(4)   | -13(4) |
| C(27) | 44(5)  | 77(6) | 69(5)  | 8(4)   | 7(4)   | -32(4) |
| C(28) | 75(6)  | 39(4) | 42(4)  | -1(3)  | 14(4)  | -3(4)  |
| C(29) | 80(6)  | 56(5) | 36(4)  | 13(3)  | 9(4)   | 14(4)  |
| C(30) | 63(5)  | 63(5) | 33(4)  | -8(3)  | 1(3)   | 16(4)  |
| C(31) | 34(4)  | 41(4) | 43(4)  | -8(3)  | 2(3)   | 7(3)   |
| C(32) | 22(3)  | 37(3) | 38(3)  | -7(3)  | 1(3)   | 4(3)   |
| C(33) | 23(3)  | 30(3) | 42(3)  | -7(3)  | 1(3)   | -2(2)  |
| C(34) | 33(4)  | 35(4) | 57(4)  | -5(3)  | 10(3)  | -1(3)  |
| C(35) | 48(4)  | 28(3) | 74(5)  | -5(3)  | 9(4)   | -7(3)  |
| C(36) | 48(4)  | 40(4) | 55(4)  | 10(3)  | 9(4)   | 3(3)   |
| C(37) | 35(4)  | 37(4) | 39(3)  | 1(3)   | 10(3)  | 0(3)   |
| C(38) | 37(4)  | 65(5) | 50(4)  | -22(4) | -5(3)  | 0(3)   |
| C(39) | 39(4)  | 45(4) | 64(5)  | -22(4) | -2(3)  | -8(3)  |

Table S5. Hydrogen coordinates ( $\times 10^4$ ) and isotropic displacement parameters ( $\text{\AA}^2 \times 10^3$ ) for  $\text{Zn}_2(\text{phen})_4\text{U}_4\text{O}_{10}(\text{OAc})_2(\text{NA})_2(\text{QA})_2$ .  $U(\text{eq})$  is defined as one third of the trace of the orthogonalized  $U_{ij}$  tensor.

| Atom   | x     | y    | z     | $U(\text{eq})$ |
|--------|-------|------|-------|----------------|
| H(3)   | 6301  | 2404 | -2162 | 80             |
| H(4)   | 5854  | 2239 | -665  | 80             |
| H(5)   | 4352  | 2697 | -176  | 80             |
| H(8)   | 10516 | 3030 | -3230 | 80             |
| H(10)  | 8071  | 1867 | -3144 | 80             |
| H(11)  | 9129  | 979  | -2830 | 80             |
| H(12)  | 10845 | 1161 | -2664 | 80             |
| H(14A) | 287   | 4945 | -3762 | 80             |
| H(14B) | 1246  | 4719 | -3158 | 80             |
| H(14C) | 762   | 4246 | -3903 | 80             |
| H(16)  | 1082  | 4953 | -1166 | 80             |
| H(17)  | -657  | 5213 | -1342 | 80             |
| H(18)  | -1847 | 4408 | -1260 | 80             |
| H(23)  | -185  | 1374 | -492  | 80             |
| H(24)  | 1570  | 1213 | -380  | 80             |
| H(25)  | 2661  | 2095 | -575  | 80             |
| H(26)  | -2262 | 3195 | -998  | 80             |
| H(27)  | -1690 | 2170 | -720  | 80             |
| H(28)  | 2787  | 2965 | 1035  | 80             |
| H(29)  | 3364  | 3270 | 2493  | 80             |
| H(30)  | 3940  | 4329 | 2768  | 80             |
| H(35)  | 4018  | 6343 | -802  | 80             |
| H(36)  | 3489  | 5929 | -2186 | 80             |
| H(37)  | 2886  | 4856 | -2305 | 80             |
| H(38)  | 4333  | 5451 | 2126  | 80             |
| H(39)  | 4351  | 6144 | 911   | 80             |

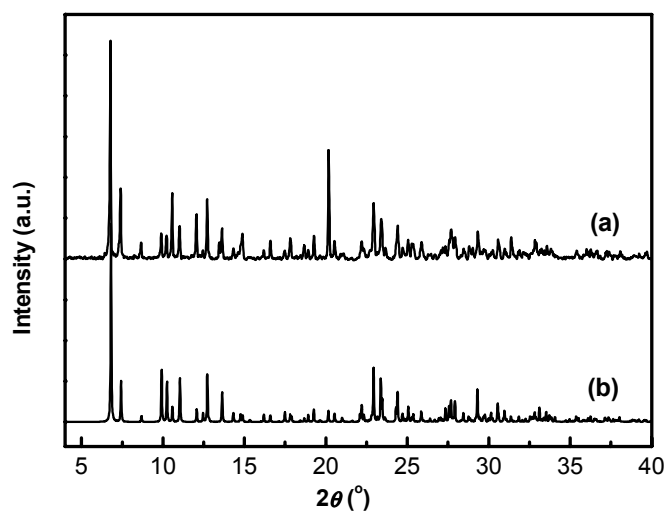

**Figure S1.** Comparison of the experimental XRD pattern (a) for **1** with the pattern simulated on the basis of the single crystal structure for **1** (b).

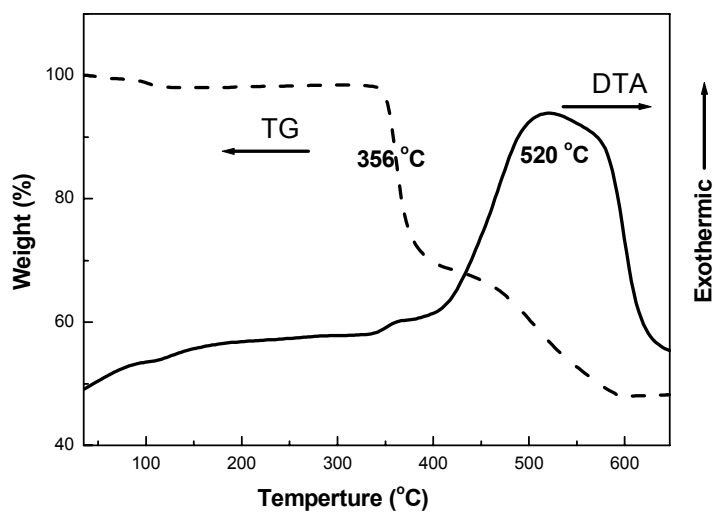

**Figure S2.** TG-DTA curves of **1**.



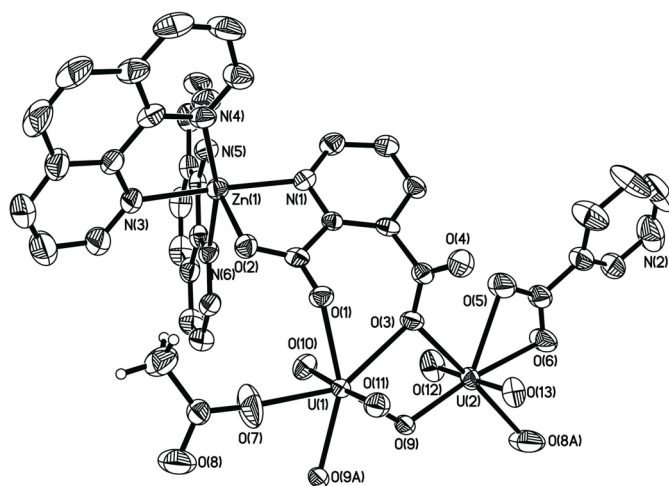

**Figure S3.** ORTEP drawing of the asymmetric unit of **1**. Thermal ellipsoids are shown at 50 % probability.

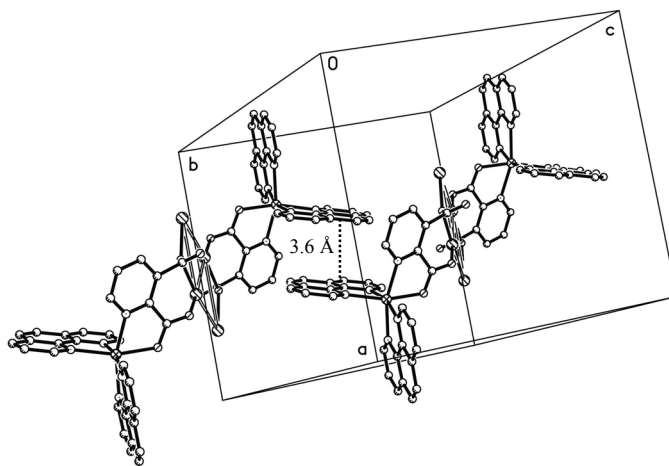

**Figure S4.** View of the compacted aromatic  $\pi$ - $\pi$  stacking interaction between the adjacent two phen in **1**.

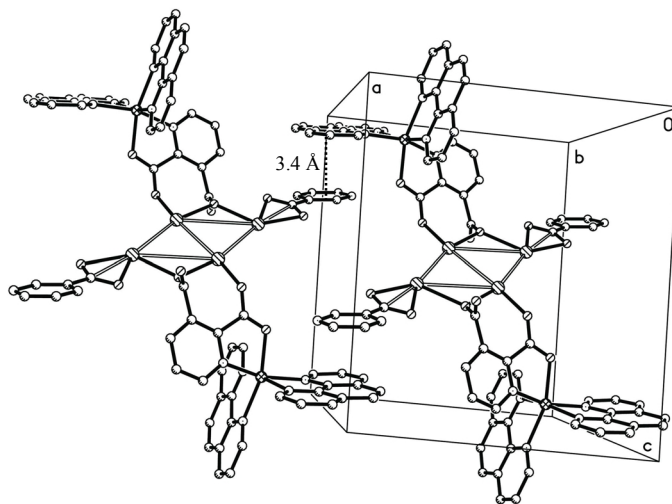

**Figure S5.** View of the aromatic  $\pi$ - $\pi$  stacking interaction between the adjacent phen and the NA ligand in **1**.

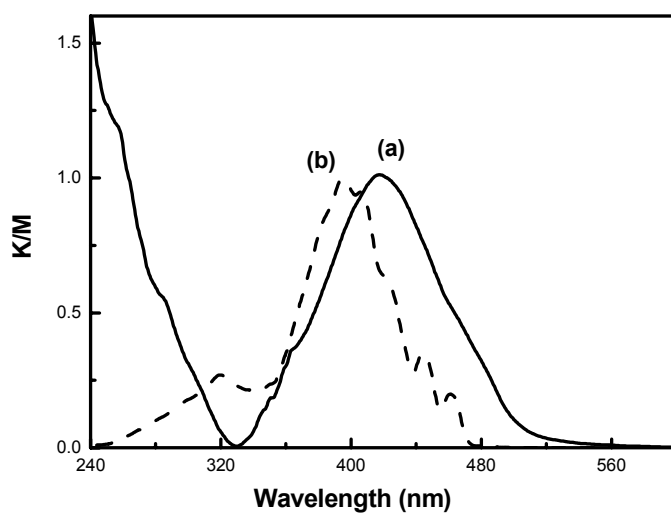

**Figure S6.** (a) UV-vis diffuse reflectance spectrum of **1** using BaSO<sub>4</sub> as the background, and for comparison, the spectrum of UO<sub>2</sub>(OAc)<sub>2</sub>·2H<sub>2</sub>O (b) is also shown.

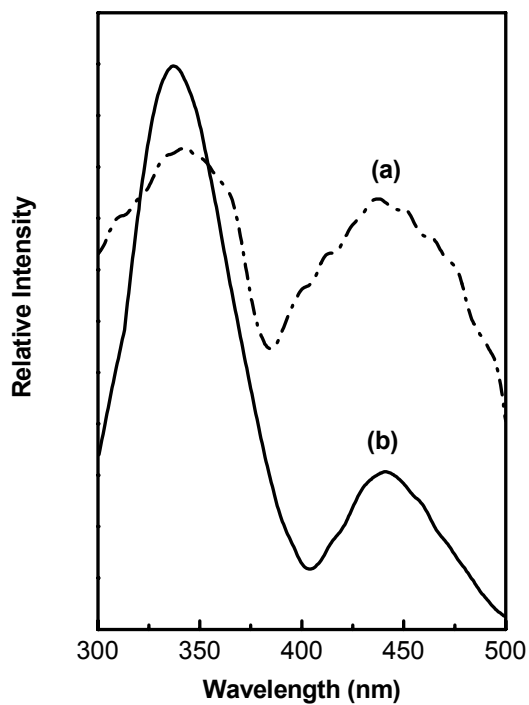

**Figure S7.** Comparison of the excitation spectrum (a) and the SPS (b) for **1**.

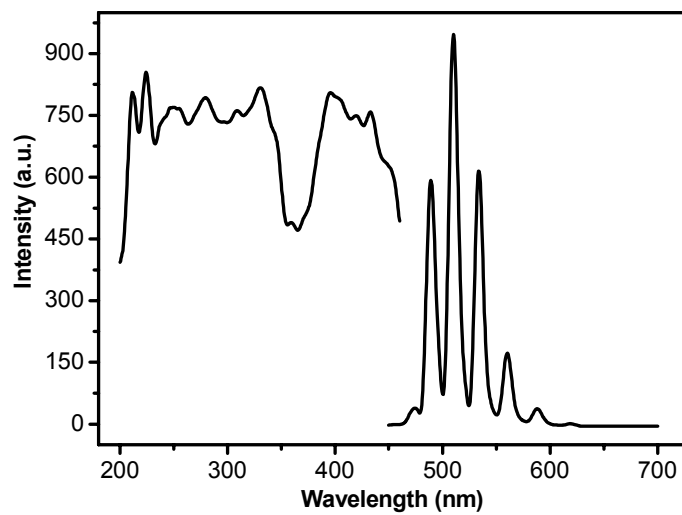

**Figure S8.** Excitation spectrum (left) and solid state emission spectrum (right) for  $\text{UO}_2(\text{OAc})_2 \cdot 2\text{H}_2\text{O}$  at room temperature.
